# Supplementary material for: A Prospective Cohort Study of Bioavailable 25-Hydroxyvitamin D Levels as a Marker of Vitamin D Status in Nontuberculous Mycobacterial Pulmonary Disease
Source: MDPI journal article supplement (doi:10.3390/nu13082524), 2021-07-23
Supplement: s1 [file s1]

## Supplementary Material

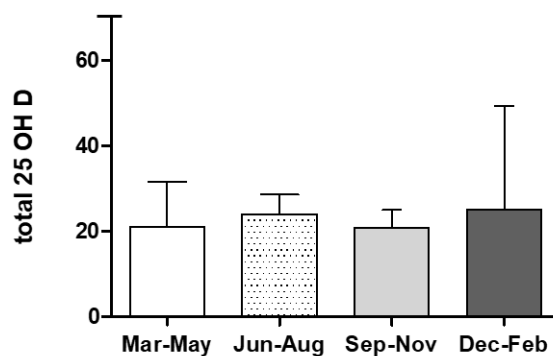

**Figure S1.** Total 25-(OH)D levels in patients with NTM-PD according to the sampling season

**Table S1.** Comparison of baseline characteristics of matched cohort according to the diagnosis.

|                          | Total (n = 90) | Control (n = 45) | NTM (n = 45) | P-value |
|--------------------------|----------------|------------------|--------------|---------|
| Age                      | 60.4 ± 9.8     | 60.1 ± 9.7       | 60.8 ± 10.0  | 0.689   |
| Sex, male                | 31 (34.3)      | 16 (35.6)        | 15 (33.3)    | <0.001  |
| BMI (kg/m <sup>2</sup> ) | 21.7 ± 2.2     | 21.6 ± 1.9       | 21.8 ± 2.5   | 0.778   |

Data are expressed as mean ± standard deviation or number (%). NTM, nontuberculous

mycobacterium; BMI, body mass index;.

Table S2. Baseline and 6-months follow-up of vitamin D indices in the matched cohort

|                                | Control<br>(n=45) | NTM<br>(n=45) | NTM (n = 45)       |             |                  |                          |
|--------------------------------|-------------------|---------------|--------------------|-------------|------------------|--------------------------|
|                                |                   |               | Observation (n=27) |             | Treatment (n=18) |                          |
|                                |                   |               | Baseline           | 6-month     | Baseline         | 6-month <sup>†</sup>     |
| Total 25-(OH)D (nmol/L)        | 62.2 ± 26.8       | 57.3 ± 25.2   | 57.2 ± 26.2        | 58.3 ± 26.7 | 57.5 ± 24.4      | 48.1 ± 26.9 <sup>†</sup> |
| 25-(OH)D <sub>2</sub>          | 0.9 ± 0.6         | 1.4 ± 2.1     | 1.6 ± 2.6          | 1.5 ± 1.9   | 1.1 ± 0.5        | 0.9 ± 0.4                |
| 25-(OH)D <sub>3</sub>          | 61.3 ± 26.8       | 55.9 ± 25.3   | 55.6 ± 26.2        | 56.7 ± 27.1 | 56.4 ± 24.5      | 47.2 ± 27.0 <sup>†</sup> |
| Genotype specific              |                   |               |                    |             |                  |                          |
| Free 25-(OH)D                  | 22.9 ± 12.6       | 19.6 ± 10.2   | 19.3 ± 11.0        | 19.2 ± 10.7 | 19.9 ± 9.2       | 16.3 ± 10.4 <sup>†</sup> |
| Bioavailable 25-(OH)D (nmol/L) | 8.8 ± 5.0         | 6.9 ± 3.7*    | 6.9 ± 4.0          | 6.6 ± 3.5   | 6.9 ± 3.3        | 5.6 ± 3.4 <sup>†</sup>   |
| 24,25-(OH)2D3 (nmol/L)         | 5.7 ± 3.5         | 4.1 ± 2.9*    | 4.2 ± 3.1          | 3.9 ± 2.7   | 3.9 ± 2.9        | 2.2 ± 2.0 <sup>†</sup>   |

Data are expressed as mean ± standard deviation. NTM, nontuberculous mycobacterium \* *P*-value < 0.05, between the NTM-PD and healthy control groups. <sup>†</sup> *P*-value < 0.05, between baseline and follow-up after 6 months in patients with NTM-PD

Table S3. Risk factors associated with NTM-PD

|                       | Univariable analysis |                 | Multivariable analysis |                 |
|-----------------------|----------------------|-----------------|------------------------|-----------------|
|                       | OR (95% CI)          | <i>P</i> -value | OR (95% CI)            | <i>P</i> -value |
| Age                   | 1.007 (0.965–1.051)  | 0.738           | –                      | –               |
| Sex, male             | 0.906 (0.380–2.163)  | 0.824           | –                      | –               |
| BMI                   | 1.028 (0.852–1.240)  | 0.775           | –                      | –               |
| Total 25-(OH)D        | 0.982 (0.943–1.022)  | 0.374           |                        |                 |
| Genotype specific     |                      |                 |                        |                 |
| Free 25-(OH)D         | 0.938 (0.856–1.029)  | 0.175           |                        |                 |
| Bioavailable 25-(OH)D | 0.781 (0.611–0.999)  | 0.049           | 0.781 (0.611–0.999)    | 0.049           |
| VDBP                  | 1.012 (0.998–1.026)  | 0.096           | –                      | –               |

NTM, nontuberculous mycobacterium; PD, pulmonary disease; OR, odds ratio; CI, confidential interval; BMI, body mass index; VDBP, vitamin D binding protein

Table S4. Vitamin D parameters in patients with NTM-PD according to the treatment outcomes

|                         | Treatment outcomes |                    | P-value |
|-------------------------|--------------------|--------------------|---------|
|                         | Success (n=13)     | Failure (n=5)      |         |
| Age                     | 61.0 (54.0 – 65.0) | 50.0 (46.0 – 62.0) | 0.289   |
| Sex, male               | 4 (30.8)           | 2 (40.0)           | >0.999  |
| BMI                     | 21.1 (19.9 – 22.1) | 22.5 (20.0 – 23.9) | 0.289   |
| AFB smear positivity    | 5 (38.5)           | 5 (100.0)          | 0.036   |
| Causative organism      |                    |                    | -       |
| <i>M. avium</i> complex | 12 (92.3)          | 5 (100.0)          |         |
| <i>M. Kansasii</i>      | 1 (7.7)            | 0 (0.0)            |         |
| Radiologic types        |                    |                    | 0.118   |
| Fibrocavitary           | 4 (30.8)           | 4 (80.0)           |         |
| Nodular bronchiectatic  | 9 (69.2)           | 1 (20.0)           |         |
| Total 25-(OH)D          | 21.9 (16.0 – 31.2) | 18.0 (13.5 – 31.0) | 0.703   |
| 25-(OH)D <sub>2</sub>   | 0.4 (0.3 – 0.5)    | 0.5 (0.4 – 0.5)    | 0.336   |
| 25-(OH)D <sub>3</sub>   | 21.0 (15.3 – 30.9) | 17.6 (13.1 – 30.5) | 0.775   |
| Genotype specific       |                    |                    |         |
| Free 25-(OH)D           | 8.3 (5.0 – 12.0)   | 7.0 (4.5 – 9.9)    | 0.924   |
| Bioavailable 25-(OH)D   | 2.6 (1.7 – 4.0)    | 2.8 (1.6 – 3.4)    | 0.924   |
| 24,25-(OH)2D3           | 2.9 (1.6 – 7.0)    | 4.0 (1.6 – 4.4)    | 0.849   |

Data are expressed as median (interquartile range). NTM, nontuberculous mycobacterium; PD, pulmonary disease; *M. avium*, *Mycobacterium avium*; *M. abscessus*, *Mycobacterium abscessus*; *M. kansasii*, *Mycobacterium kansasii*; AFB, acid-fast bacilli
